# Supplementary material for: Pulse oximeter with integrated management of childhood illness for diagnosis of severe childhood pneumonia at rural health institutions in Southern Ethiopia: results from a cluster-randomised controlled trial
Source: PubMed Central journal article supplement — BMJ Open. 2020 Jun 21;10(6):e036814. doi: 10.1136/bmjopen-2020-036814 (PMC7311017; doi:10.1136/bmjopen-2020-036814), 2020-06-21
Supplement: bmjopen-2020-036814supp001.pdf [file bmjopen-2020-036814supp001.pdf]

Supplementary Table 1: Sensitivity and specificity of clinical signs.

| Clinical signs                      | Pulse oximeter |              |       | Sensitivity | Specificity | Positive predictive value | Negative predictive value |
|-------------------------------------|----------------|--------------|-------|-------------|-------------|---------------------------|---------------------------|
|                                     | Hypoxemia      | No hypoxemia | Total |             |             |                           |                           |
| Chest in-drawing                    |                |              |       | 59%         | 81%         | 35%                       | 92%                       |
| Yes                                 | 79             | 147          | 226   |             |             |                           |                           |
| No                                  | 56             | 626          | 682   |             |             |                           |                           |
| Total                               | 135            | 773          | 908   |             |             |                           |                           |
| Fast breathing                      |                |              |       | 94%         | 25%         | 18%                       | 96%                       |
| Yes                                 | 127            | 587          | 714   |             |             |                           |                           |
| No                                  | 8              | 194          | 202   |             |             |                           |                           |
| Total                               | 135            | 781          | 916   |             |             |                           |                           |
| Chest in-drawing and fast breathing |                |              |       | 57%         | 82%         | 35%                       | 92%                       |
| Yes                                 | 78             | 145          | 223   |             |             |                           |                           |
| No                                  | 57             | 641          | 698   |             |             |                           |                           |
| Total                               | 135            | 786          | 921   |             |             |                           |                           |
